# Supplementary material
Source: Springer Nature journal article supplement (https://www.springermedizin.de/resource/supplementary/12968_2008_24_MOESM4_ESM.pdf/9577812)

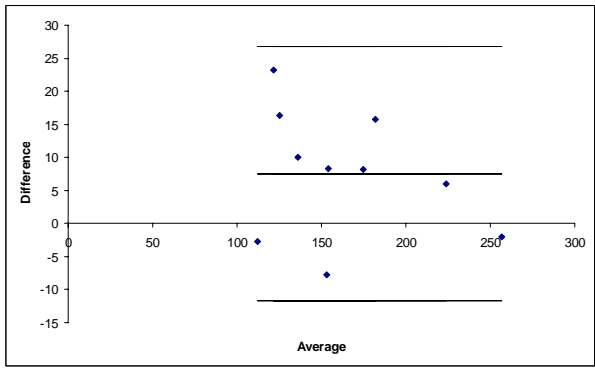

EDV (mL)

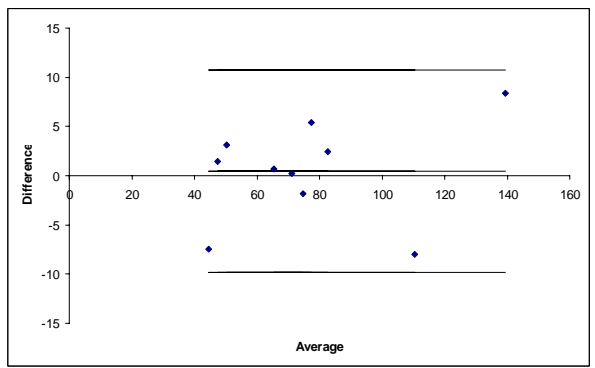

ESV (mL)

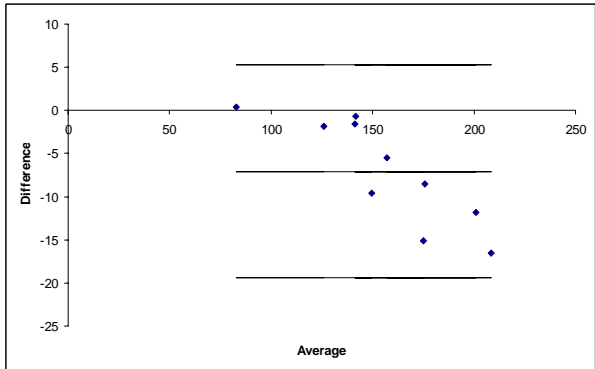

LV mass (g)

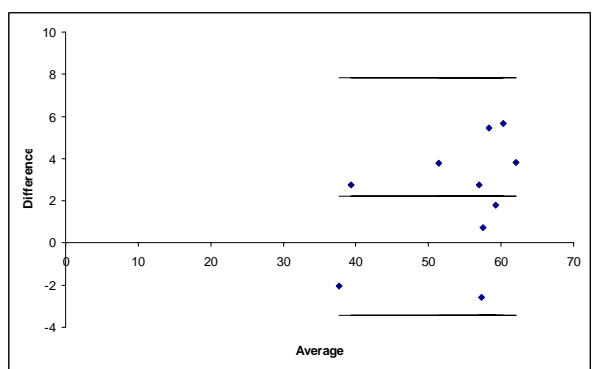

EF (%)

Supplement: MOESM4 [file 9577812]
